# Supplementary material for: A SrGeO3 inorganic electron-transporting layer for high-performance perovskite solar cells
Source: Royal Society of Chemistry journal article supplement (doi:10.1039/c9ta03176f), 2019-01-01
Supplement: c9ta03176f1.pdf [file c9ta03176f1.pdf]

## Supporting Information

### **SrGeO<sub>3</sub> inorganic electron-transporting layer for high-performance perovskite solar cells**

*Qing-Qing Ye, Zhao-Kui Wang\*, Igbari Femi, Kai-Li Wang, Yue Zhang, Xing-Juan Ma, Ming-Peng Zhuo, and Liang-Sheng Liao\**

Institute of Functional Nano & Soft Materials (FUNSOM),  
Jiangsu Key Laboratory for Carbon-Based Functional Materials & Devices,  
Soochow University,  
Suzhou 215123, China  
E-mail: zkwang@suda.edu.cn; lsiao@suda.edu.cn

Keywords: SrGeO<sub>3</sub>; Electron-transporting layer; Conductivity; Solar cells.

### Table of Contents

- Figure S1.** Full scan XPS spectrum of SrGeO<sub>3</sub> film.
- Figure S2.** UPS spectrum of SrGeO<sub>3</sub> film and energy levels of materials in PSCs
- Figure S3.** Contact angles of SrGeO<sub>3</sub> and TiO<sub>2</sub> films
- Figure S4.** Device performance dependent on the SrGeO<sub>3</sub> concentration.
- Figure S5.** Histogram of PCEs in SrGeO<sub>3</sub>- and TiO<sub>2</sub>- based PSCs.
- Figure S6.** Current hysteresis evaluation of SrGeO<sub>3</sub> based PSCs.
- Figure S7.** SEM images of SrGeO<sub>3</sub> film.
- Figure S8.** Normalized PCEs as a function of time in TiO<sub>2</sub> and SrGeO<sub>3</sub> based PSCs under UV irradiation without encapsulation
- Figure S9.** Cross-SEM images of TiO<sub>2</sub> and SrGeO<sub>3</sub> based PSCs.
- Figure S10.** *J-V* curves (forward and reverse scan direction) of TiO<sub>2</sub> based perovskite solar cells measured under simulated AM 1.5 sunlight of 100 mW/cm<sup>2</sup> irradiance.

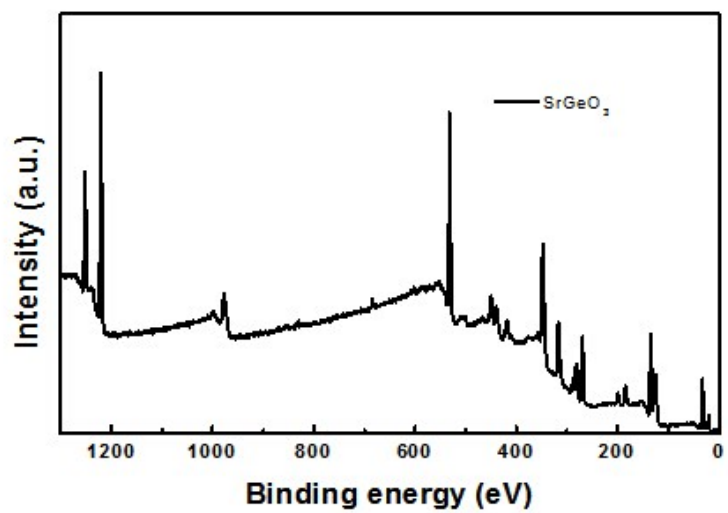

**Figure S1.** Full scan XPS spectrum of SrGeO<sub>3</sub> film.

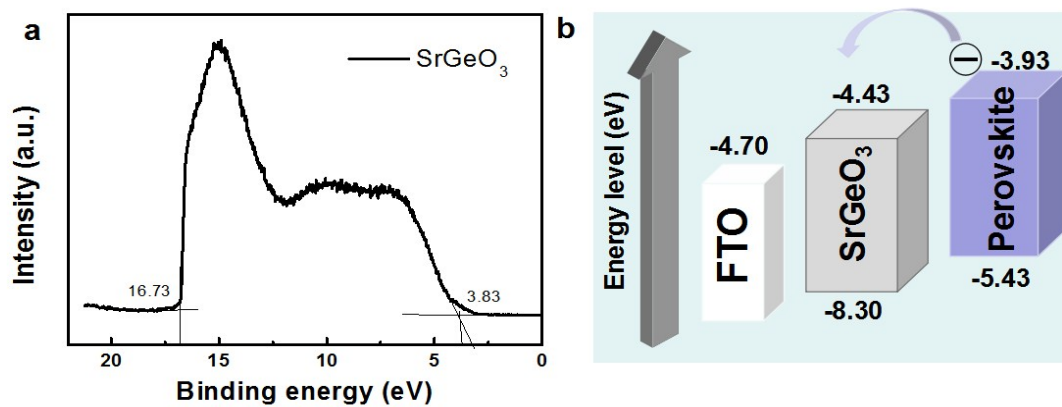

**Figure S2.** (a) UPS spectrum of SrGeO<sub>3</sub> film. (b) Schematic illustration of the energy levels of FTO, SrGeO<sub>3</sub>, and CH<sub>3</sub>NH<sub>3</sub>PbI<sub>3</sub> films.

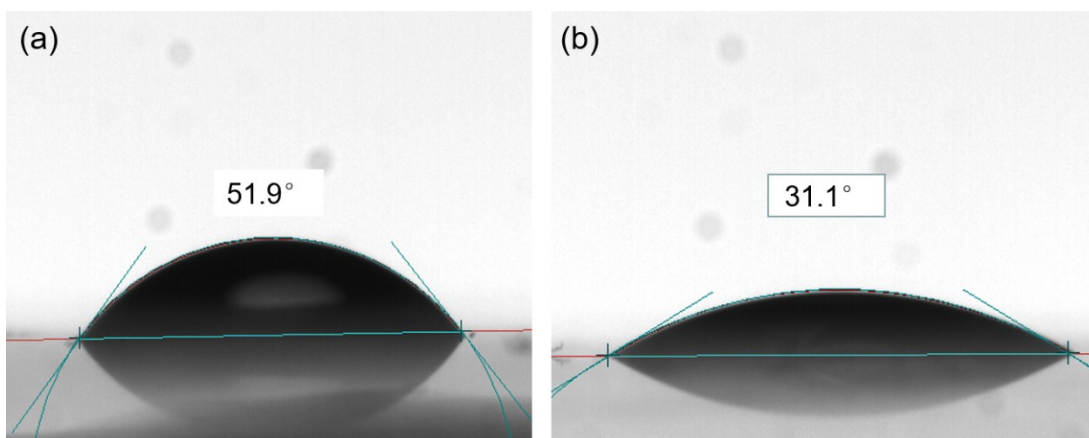

**Figure S3.** Contact angles of (a)  $\text{TiO}_2$  and (b)  $\text{SrGeO}_3$  films by dropping the perovskite solution (Solvent, GBL: DMSO =7:3) onto the  $\text{TiO}_2$  and  $\text{SrGeO}_3$  films

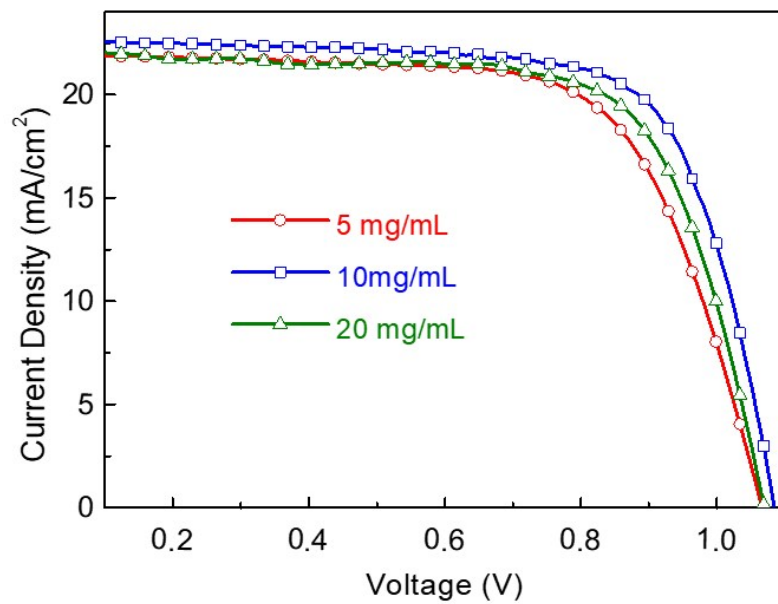

**Figure S4.** *J-V* curves of SrGeO<sub>3</sub> (varied concentration) based perovskite solar cells measured under simulated AM 1.5 sunlight of 100 mW/cm<sup>2</sup> irradiance.

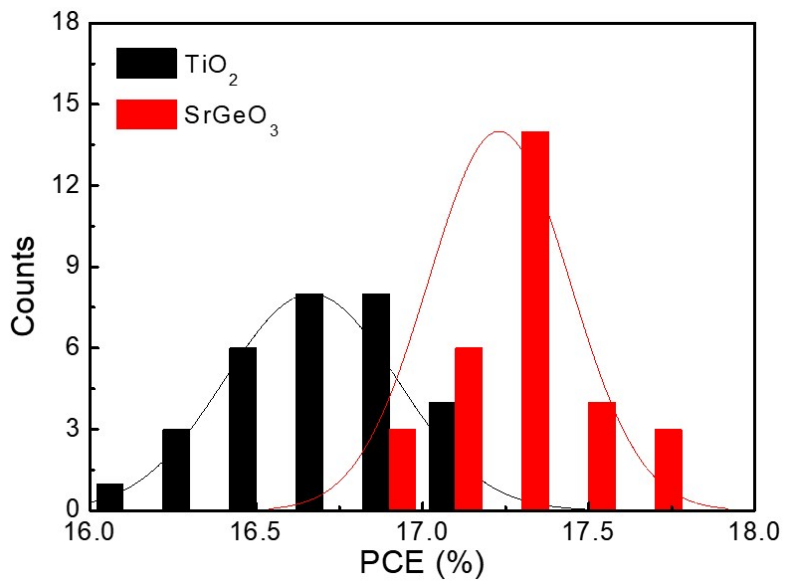

**Figure S5.** Histogram of PCEs in SrGeO<sub>3</sub>- and TiO<sub>2</sub>- based PSCs.

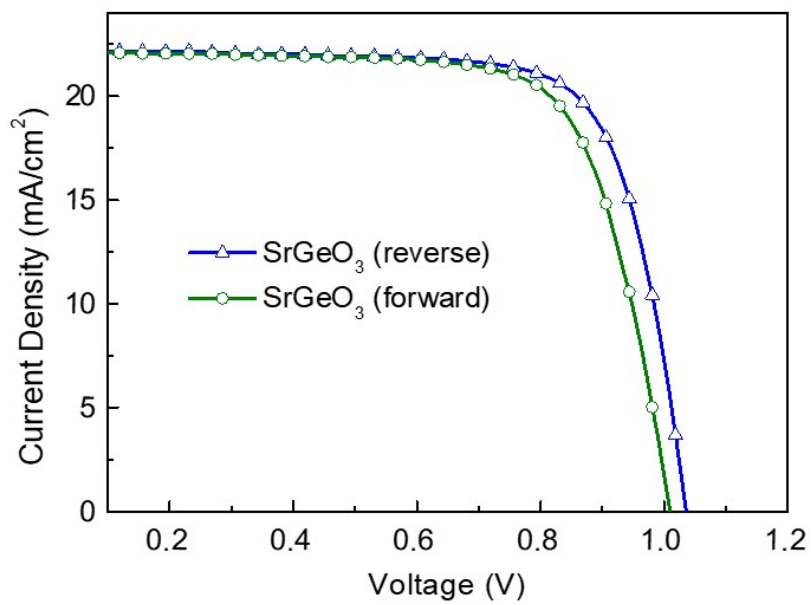

**Figure S6.** *J-V* curves (forward and reverse scan direction) of SrGeO<sub>3</sub> based perovskite solar cells measured under simulated AM 1.5 sunlight of 100 mW/cm<sup>2</sup> irradiance.

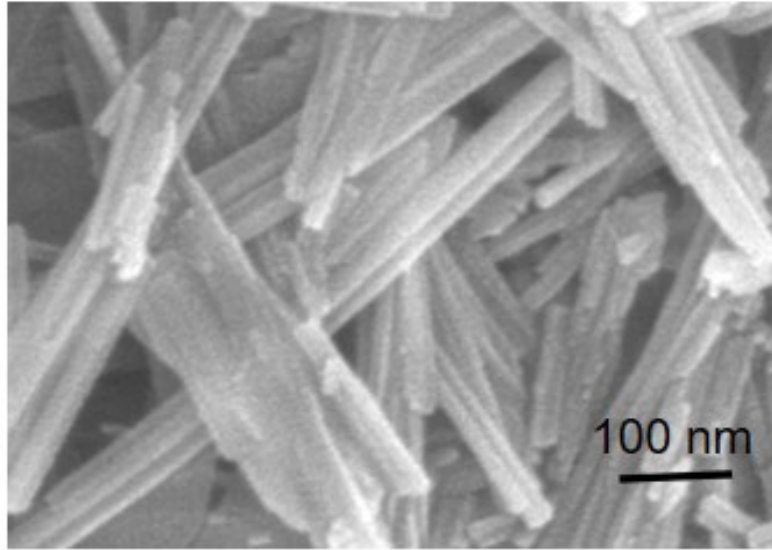

**Figure S7.** SEM images of SrGeO<sub>3</sub> film.



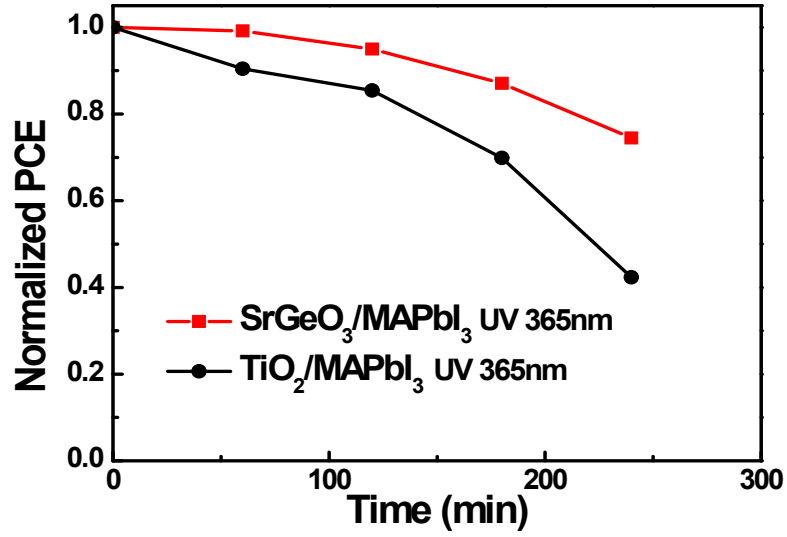

**Figure S8.** Normalized PCEs as a function of time in TiO<sub>2</sub> and SrGeO<sub>3</sub> based PSCs under UV irradiation without encapsulation.

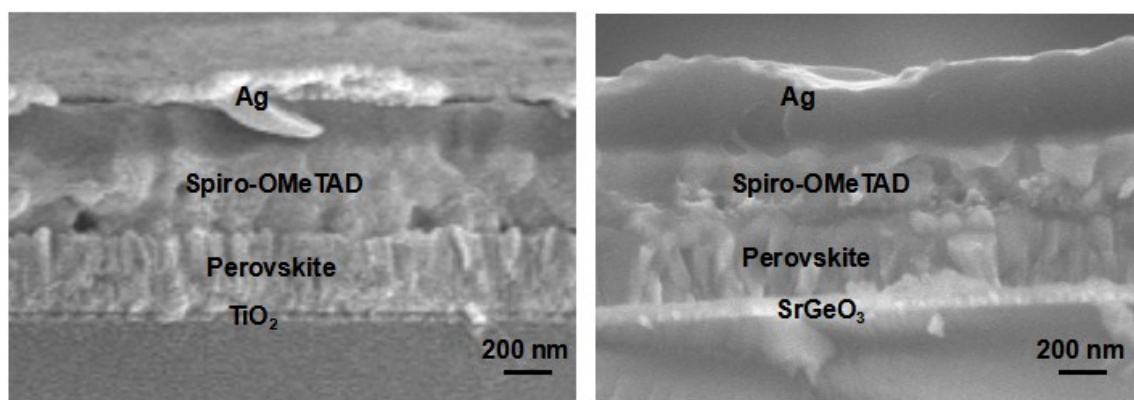

**Figure S9.** Cross-SEM images of TiO<sub>2</sub> and SrGeO<sub>3</sub> based PSCs.

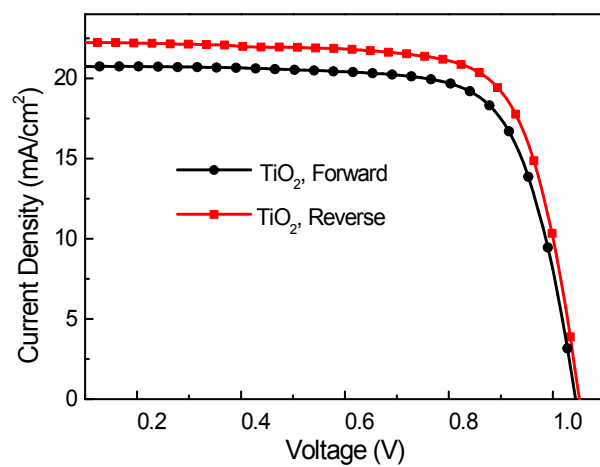

**Figure S10.**  $J$ - $V$  curves (forward and reverse scan direction) of TiO<sub>2</sub> based perovskite solar cells measured under simulated AM 1.5 sunlight of 100 mW/cm<sup>2</sup> irradiance.
